# Supplementary material for: Fabrication of Superhydrophobic/Superoleophilic Bamboo Cellulose Foam for Oil/Water Separation
Source: MDPI journal article supplement (doi:10.3390/polym14235162), 2022-11-27
Supplement: s1 [file s1]

---

*Supplementary Materials*

**Fabrication of Superhydrophobic/Superoleophilic  
Bamboo Cellulose Foam for Oil/Water Separation**

**Chun-Hua Liu <sup>†</sup>, Jiao-Ping Shang <sup>†</sup>, Xing Su, Shuang Zhao, Yun Peng <sup>\*</sup> and Yi-Bao Li <sup>\*</sup>**

Engineering Research Center of Jiangxi Province for Bamboo-based Advanced Materials  
and Biomass Conversion, College of Chemistry and Chemical Engineering,  
Gannan Normal University, Ganzhou 341000, China

<sup>\*</sup> Correspondence: pengyun@buaa.edu.cn (Y.P.); liyb@gnnu.cn (Y.-B.L.)

<sup>†</sup> These authors contributed equally to this work.

Table S1. Bleached bamboo pulp ingredients

| M $\eta$<br>(w) | $\alpha$ -cellulose<br>(%) | Hemicellulose<br>(%) | Ash<br>(%) | Fe <sup>3+</sup><br>(mg/kg) | Whiteness<br>(%) | Dichloromethane extract<br>(%) |
|-----------------|----------------------------|----------------------|------------|-----------------------------|------------------|--------------------------------|
| 19              | 86                         | 16.6                 | 1.0        | 58.                         | 86.6             | 6.0                            |

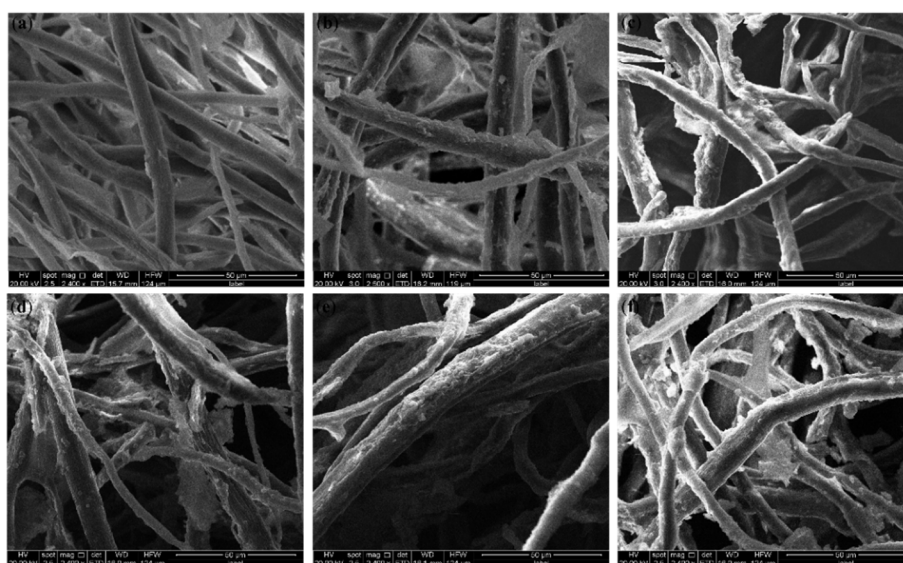

Figure S1. SEM images of original foam (a) and modified foams with various concentration of CHDTMS including : 1 mmol/L (b), 4 mmol/L (c), 7 mmol/L (d), 10 mmol/L (e), and 13 mmol/L (f)

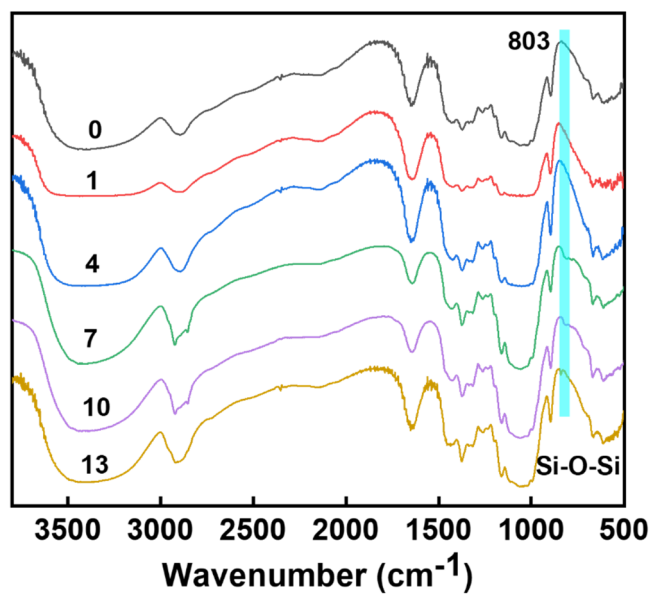

Figure S2. FTIR spectra of original foam and modified foams with various concentration of CHDTMS

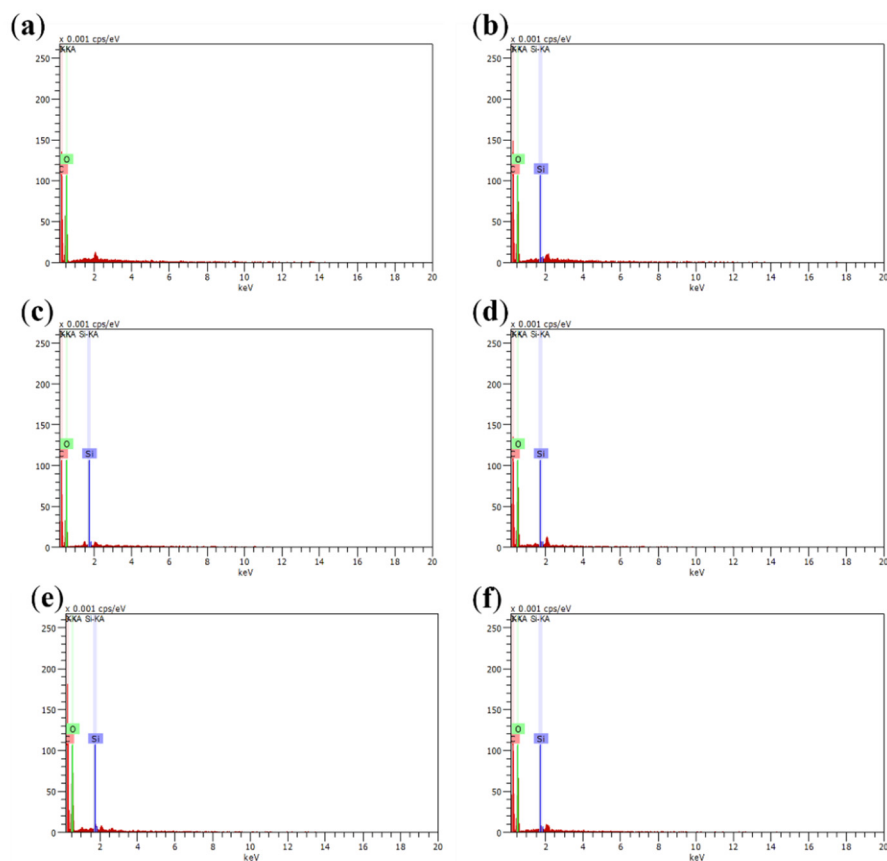

**Figure S3.** EDS data of original foam (a) and modified foams with various concentration of  $C_{\text{HDTMS}}$ : (b) 1 mmol/L, (c) 4 mmol/L, (d) 7 mmol/L, (e) 10 mmol/L, and (f) 13 mmol/L

**Table S2.** EDS data of the Si content in of raw foam and modified foams with various concentration of  $C_{\text{HDTMS}}$

| Element  | Line Type | 0 mmol/L | 1 mmol/L | 4 mmol/L | 7 mmol/L | 10 mmol/L | 13 mmol/L |
|----------|-----------|----------|----------|----------|----------|-----------|-----------|
| C (wt%)  | K-series  | 58.14    | 33.6     | 38.44    | 46.69    | 46.1      | 41.74     |
| O (wt%)  | K-series  | 72.76    | 40.94    | 45.65    | 53.12    | 54.86     | 41.74     |
| Si (wt%) | K-series  | 0        | 0.21     | 0.23     | 0.3      | 0.35      | 0.47      |

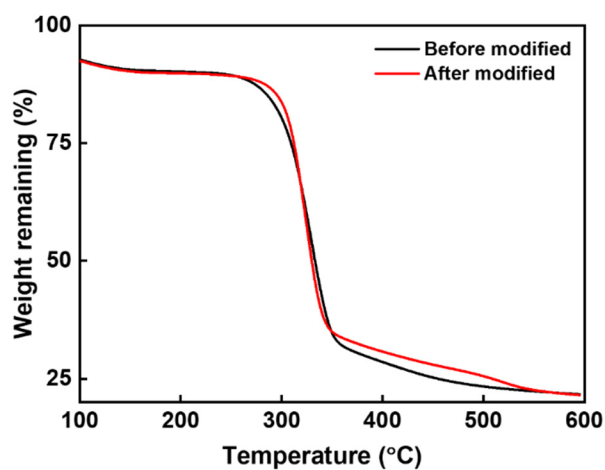

**Figure S4.** TG of bamboo cellulose foams before (black line) and after (red line) modification.

**Table S3.** The changes of after modification foams with different  $C_{\text{HDTMS}}$  in weight, contact angle and oil absorption

| $C_{\text{(HDTMS)}}$<br>mmol/L | before<br>modification<br>(g) | after<br>modification<br>(g) | $\Delta m_{\text{(After - before)}}$<br>(g) | adsorption<br>rate<br>(g/g) | Contact<br>Angle<br>(°) |
|--------------------------------|-------------------------------|------------------------------|---------------------------------------------|-----------------------------|-------------------------|
| 1                              | 0.2135                        | 0.22367                      | 0.01017                                     | 11                          | 160.72                  |
| 4                              | 0.3008                        | 0.31228                      | 0.01148                                     | 12.98                       | 163.44                  |
| 7                              | 0.2407                        | 0.25401                      | 0.01331                                     | 11.38                       | 164.39                  |
| 10                             | 0.2479                        | 0.26452                      | 0.01662                                     | 10.75                       | 164.71                  |
| 13                             | 0.2121                        | 0.23604                      | 0.02394                                     | 11.31                       | 165.02                  |

### Video S1

The observation of heavy oil adsorption of the super-wetting bamboo cellulose foam through a camera.

### Video S2

The observation of light oil adsorption of the super-wetting bamboo cellulose foam through a camera.
